# Supplementary material
Source: publisher site journal article supplement (https://www.dovepress.com/get_supplementary_file.php?f=288360.docx)

**Supplemental material**


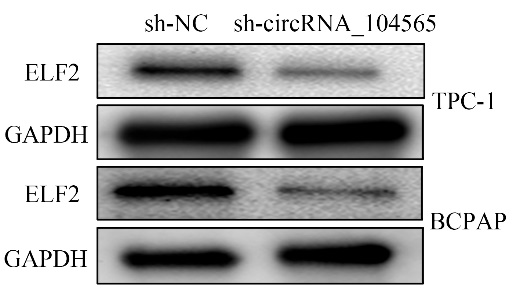


Figure S1. silencing circRNA_104565 suppressed ELF2 expression in PTC cells.

Supplement: Supplementary file 1 [file get_supplementary_file.php]
